# Supplementary material for: Hierarchically nanostructured MnCo2O4 as active catalysts for the synthesis of N-benzylideneaniline from benzyl alcohol and aniline
Source: Royal Society of Chemistry journal article supplement (doi:10.1039/c6gc02065h), 2016-11-09
Supplement: c6gc02065h1.pdf [file c6gc02065h1.pdf]

Supporting Information

**Hierarchically nanostructured  $\text{MnCo}_2\text{O}_4$  as active catalysts for synthesis of *N*-benzylideneaniline from benzyl alcohol and aniline**

Xiubing Huang, Liping Liu, Hongyi Gao, Wenjun Dong, Mu Yang, Ge Wang\*

Beijing Key Laboratory of Function Materials for Molecule & Structure Construction,  
School of Materials Science and Engineering, University of Science and Technology  
Beijing, Beijing, 100083, China

\*Corresponding author: Prof. Ge Wang ([gewang@mater.ustb.edu.cn](mailto:gewang@mater.ustb.edu.cn))

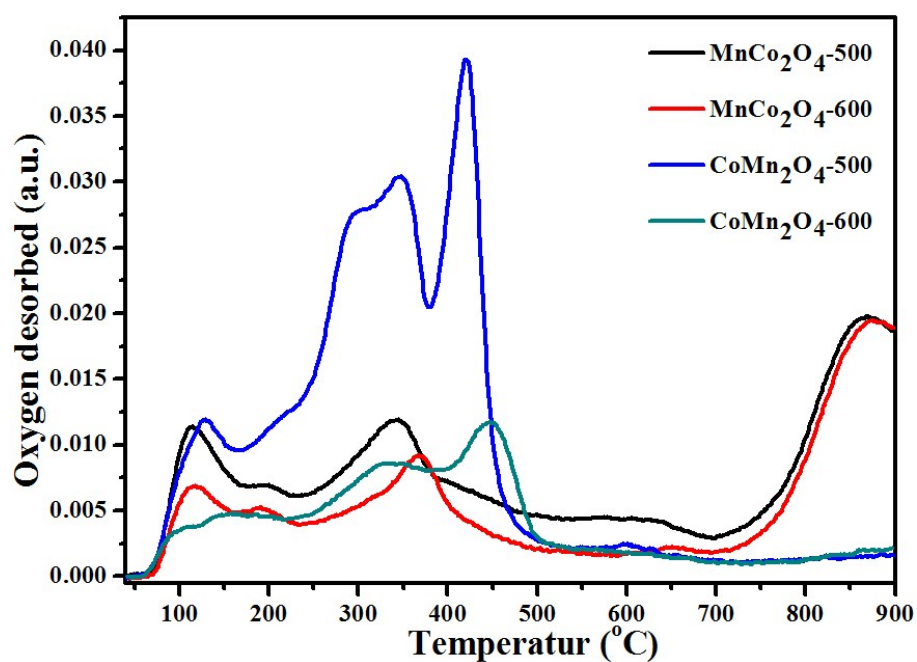

Figure S1. O<sub>2</sub>-TPD profiles of as-prepared catalysts.

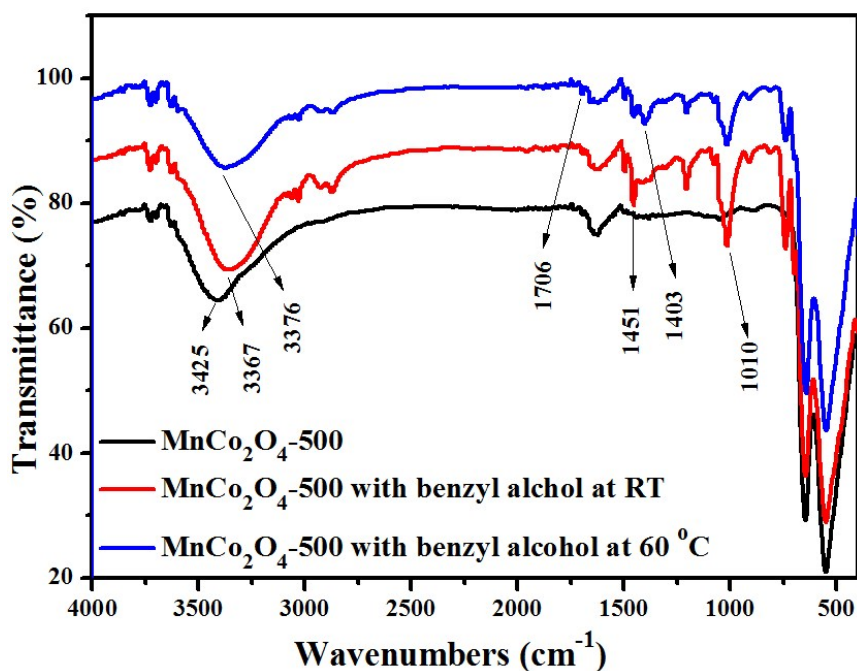

**Figure S2.** FT-IR spectrum of MnCo<sub>2</sub>O<sub>4</sub>-500, MnCo<sub>2</sub>O<sub>4</sub>-500 with benzyl alcohol at room temperature, MnCo<sub>2</sub>O<sub>4</sub>-500 with benzyl alcohol after heat treatment at 60 °C under air for 1 h.

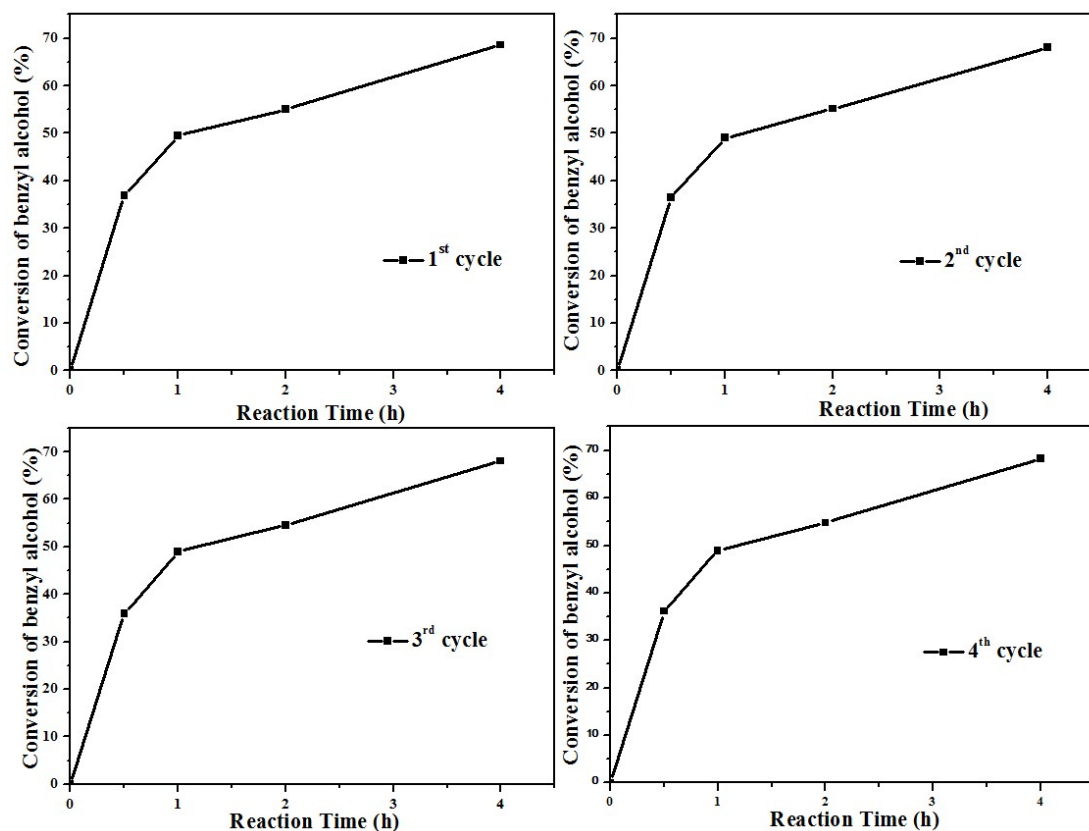

**Figure S3.** Recycle test of MnCo<sub>2</sub>O<sub>4</sub>-500 at 60 °C under 1 atm O<sub>2</sub> for 4 h. The catalyst after each cycle was collected by centrifugation and washing with ethanol three times to remove the products, and dry at 80 °C for 12 h, followed by calcination at 400 °C in air for 4 h. After this treatment, the obtained catalyst was tested for the second time reaction.

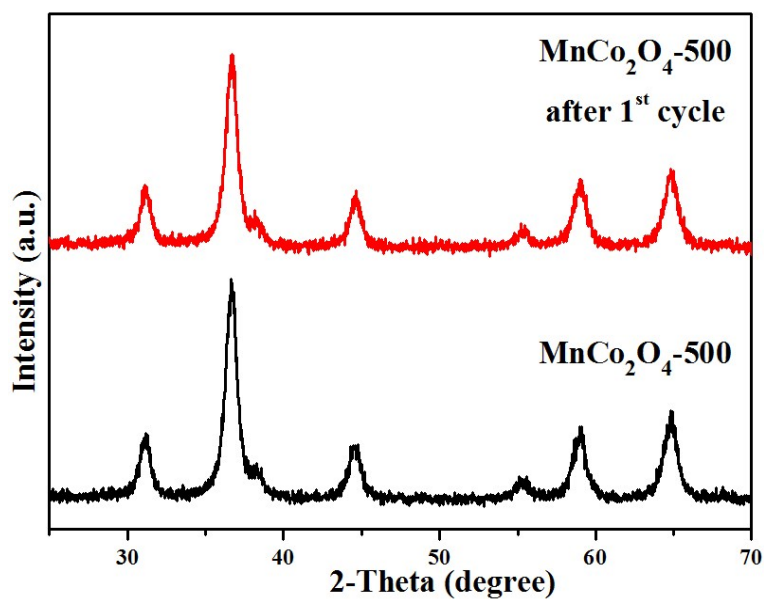

**Figure S4.** XRD patterns of fresh  $\text{MnCo}_2\text{O}_4\text{-500}$  and after 1<sup>st</sup> catalytic cycle.

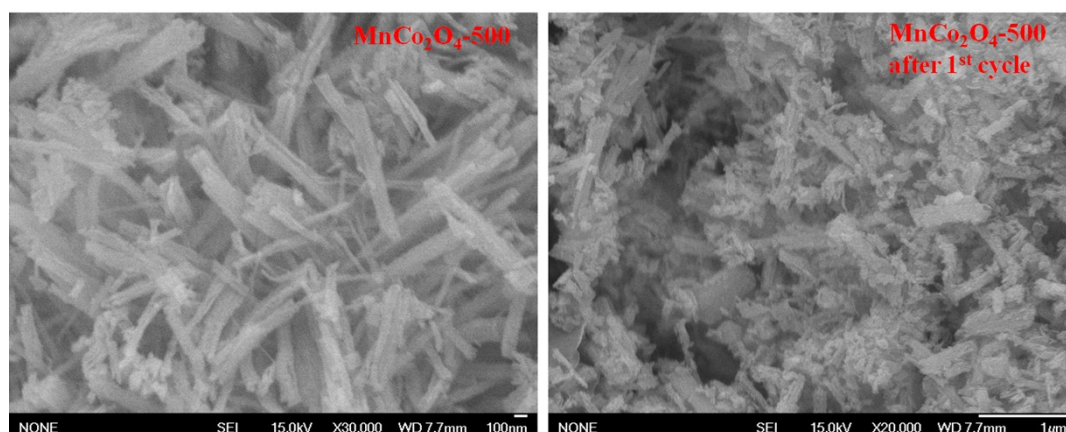

**Figure S5.** SEM images of fresh  $\text{MnCo}_2\text{O}_4\text{-500}$  and after 1<sup>st</sup> catalytic cycle.

**Table S1.** Comparison of catalytic activity of  $\text{MnCo}_2\text{O}_4\text{-500}$  and reported catalysts in the synthesis of *N*-benzylideneaniline from benzyl alcohol and aniline.

| catalyst                             | Amount (mg) | BA (mmol) | Aniline (mmol) | gas | T (°C) | Time (h) | Con. (%) | Sel. (%) | Ref.      |
|--------------------------------------|-------------|-----------|----------------|-----|--------|----------|----------|----------|-----------|
| $\text{MnCo}_2\text{O}_4\text{-500}$ | 35          | 0.5       | 1.0            | air | 80     | 12       | 93.9     | 92.8     | this work |
| $\text{CeO}_2$                       | 50          | 1.0       | 2.0            | air | 60     | 24       | 99       | 97       | Ref. 1    |
| K-OSM-2                              | 50          | 1.0       | 2.0            | air | 110    | 24       | 100      | 99       | Ref. 2    |

#### References

- Masazumi Tamura, Keiichi Tomishige, Redox Properties of  $\text{CeO}_2$  at Low Temperature: The Direct Synthesis of Imines from Alcohol and Amine, *Angew. Chem. Int. Ed.* **2015**, 54, 864 – 867.
- Shanthakumar Sithambaram, Ranjit Kumar, Young-Chan Son, Steven L. Suib, Tandem catalysis: Direct catalytic synthesis of imines from alcohols using manganese octahedral molecular sieves, *Journal of Catalysis*, 2008, 253, 269–277.
